# Supplementary material
Source: publisher site journal article supplement (https://www.dovepress.com/get_supplementary_file.php?f=445826.docx)
Supplement: Supplementary file 1 [file get_supplementary_file.php]

Supplemental Material

Table S1. Baseline characteristics comparison between included and excluded patients in hospitalized patients with COVID-19.

Table S2. Baseline characteristics of hospitalized patients with COVID-19 in the nirmatrelvir–ritonavir and control groups.

Table S3. Sensitivity analyses of outcomes of hospitalized COVID-19 patients treated with nirmatrelvir-ritonavir compared to the control group using Cox regression models.

Table S4. Sensitivity analysis of outcomes in hospitalized COVID-19 patients treated with nirmatrelvir-ritonavir compared to control group after multiple imputation.

Table S5. Sensitivity analysis of nirmatrelvir-ritonavir's effects on outcomes in hospitalized COVID-19 patients including events within 24 Hours of admission.

Table S6. Subgroup analyses of all-cause mortality for hospitalized COVID-19 nirmatrelvir-ritonavir versus control group after IPTW-adjusted.

Table S7. Subgroup analyses of Disease progression for hospitalized COVID-19 nirmatrelvir-ritonavir versus control group.

Table S8. Subgroup analyses of outcomes for hospitalized COVID-19 according to vaccination and immunity status.

**Table S1. Baseline characteristics comparison between included and excluded patients in hospitalized patients with COVID-19.**

| characteristics | included participants | excluded participants | Standardize diff. |
| --- | --- | --- | --- |
| 299 | 821 |
| Age, years | 67.88 ± 18.33 | 74.40 ± 12.26 | 0.42 |
| Female sex | 108 (36.1%) | 289 (35.2%) | 0.02 |
| Adequate health insurance | 47 (15.7%) | 148 (18.0%) | 0.07 |
| Duration of symptoms to hospitalization, days | 2.63 ± 1.64 | 10.93 ± 5.58 | 2.02 |
| Hypertension | 124 (41.5%) | 496 (60.4%) | 0.39 |
| Diabetes | 67 (22.4%) | 283 (34.5%) | 0.27 |
| Chronic lung diseases | 84 (28.1%) | 356 (43.4%) | 0.32 |
| Chronic liver disease | 34 (11.4%) | 110 (13.4%) | 0.06 |
| Cardiovascular disease | 97 (32.4%) | 366 (44.6%) | 0.25 |
| Cerebrovascular disease | 51 (17.1%) | 142 (17.3%) | 0.01 |
| Chronic kidney disease | 49 (16.4%) | 181 (22.1%) | 0.14 |
| Neurological diseases | 9 (3.0%) | 30 (3.7%) | 0.04 |
| Oncology | 30 (10.0%) | 59 (7.2%) | 0.10 |
| Immunosuppression | 37 (12.4%) | 93 (11.3%) | 0.03 |
| Oxygen support | 226 (75.6%) | 784 (95.5%) | 0.59 |

**Table S2. Baseline characteristics of hospitalized patients with COVID-19 in the nirmatrelvir–ritonavir and control groups.**

| **characteristics** | **Nirmatrelvir-ritonavir** | **Control** | **P-value** |
| --- | --- | --- | --- |
| 167 | 132 |  |
| Female sex | 66 (39.5%) | 42 (31.8%) | 0.169 |
| Age, years | 67.92 ± 17.32 | 67.84 ± 19.60 | 0.972 |
| >65 | 110 (65.9%) | 83 (62.9%) | 0.592 |
| Ethnicity |  |  |  |
| Han | 161 (96.4%) | 130 (98.5%) | 0.269 |
| Minority | 6 (3.6%) | 2 (1.5%) |
| Adequate health insurance | 143 (85.6%) | 109 (82.6%) | 0.471 |
| Vaccination status, doses |  |  |  |
| ≤1 | 67 (43.2%) | 61 (48.8%) | 0.389 |
| 2 | 16 (10.3%) | 16 (12.8%) |
| ≥3 | 72 (46.5%) | 48 (38.4%) |
| Duration of symptoms to hospitalization, days | 2.55 ± 1.74 | 2.73 ± 1.50 | 0.356 |
| **Comorbidities** |  |  |  |
| BMI≥30, kg/m2 | 9 (5.4%) | 13 (9.9%) | 0.143 |
| Hypertension | 64 (38.3%) | 60 (45.5%) | 0.214 |
| Diabetes | 37 (22.2%) | 30 (22.7%) | 0.906 |
| Chronic lung diseases | 40 (24.0%) | 44 (33.3%) | 0.073 |
| Cardiovascular disease | 42 (25.2%) | 55 (41.7%) | 0.002 |
| Cerebrovascular disease | 23 (13.8%) | 28 (21.2%) | 0.089 |
| Chronic kidney disease | 26 (15.6%) | 23 (17.4%) | 0.667 |
| Chronic liver disease | 16 (9.6%) | 18 (13.6%) | 0.273 |
| Neurological diseases | 3 (1.8%) | 6 (4.6%) | 0.167 |
| Oncology | 20 (12.0%) | 10 (7.6%) | 0.209 |
| Immunosuppression | 26 (15.6%) | 11 (8.3%) | 0.059 |
| **Concomitant treatments initiated on admission** | |  |  |
| Oxygen support | 126 (75.5%) | 100 (75.8%) | 0.951 |
| ICU admission | 16 (9.6%) | 2 (1.5%) | 0.004 |
| Ventilatory support | 6 (3.6%) | 1 (0.8%) | 0.107 |
| Dexamethasone | 23 (13.8%) | 6 (4.6%) | 0.007 |
| Other systemic steroid | 38 (22.8%) | 31 (23.5%) | 0.882 |
| Antibiotics | 62 (37.1%) | 55 (41.7%) | 0.424 |
| Baricitinib | 1 (0.6%) | 2 (1.5%) | 0.43 |
| Tocilizumab | 1 (0.6%) | 0 (0.0%) | 0.373 |
| Remdesivir | 0 (0.0%) | 0 (0.0%) | - |
| BMI, body mass index; ICU, intensive center unit. | | | |

**Table S3. Sensitivity analyses of outcomes of hospitalized COVID-19 patients treated with nirmatrelvir-ritonavir compared to the control group using Cox regression models.**

| Outcomes | Nirmatrelvir-ritonavir | Control | P value | Unadjusted | multivariate Cox regression† | multivariate Cox regression†† |
| --- | --- | --- | --- | --- | --- | --- |
| n (%) | n (%) | HR (95%CI) | HR (95%CI) | HR (95%CI) |
| All-cause mortality | 20 (12.0) | 30 (22.7) | 0.013 | 0.49 (0.28, 0.86) | 0.46 (0.26, 0.82) | 0.48 (0.25, 0.91) |
| All-cause mortality within 7 days | 8 (4.8) | 18 (13.6) | 0.007 | 0.34 (0.15, 0.79) | 0.32 (0.13, 0.77) | 0.22 (0.07, 0.64) |
| All-cause mortality within 14 days | 16 (9.6) | 24 (18.2) | 0.030 | 0.50 (0.26, 0.93) | 0.48 (0.25, 0.92) | 0.51 (0.25, 1.05) |
| *Disease progression (invasive mechanical ventilation, ICU admission, death） | 22 (14.7) | 30 (23.3) | 0.043 | 0.59 (0.34, 1.02) | 0.58 (0.33, 1.02) | 0.70 (0.37, 1.34) |
| *Invasive mechanical ventilation | 4 (2.7) | 2 (1.6) | 0.507 | 1.56 (0.29, 8.53) | 1.64 (0.30, 9.06) | 10.68 (0.22, 512.76) |
| *ICU Admission | 2 (1.3） | 1 (0.8) | 0.705 | 1.61 (0.15, 17.73) | 1.68 (0.15, 19.00) | - |
| Cardiovascular thromboembolic events | 2 (1.2) | 0 (0.0) | 0.207 | - | - | - |
| Readmission | 7(4.2) | 8 (6.1) | 0.462 | 0.56 (0.20, 1.56) | 0.47 (0.17, 1.32) | 0.78 (0.24, 2.51) |
| Re-infection with COVID-19 | 1 (0.6) | 0 (0.0) | 0.073 | - | - | - |
| HR, hazard ratio; CI, confidence interval; BMI, body mass index; ICU, intensive center unit  *25 patients admitted to the ICU or receiving invasive tracheal intubation within 24 h of admission were excluded † Adjusted covariates include age, sex, and BMI †† Adjusted covariates include: age, sex, BMI, adequate health insurance, vaccination status, chronic lung diseases chronic, cardiovascular disease, cerebrovascular disease, chronic kidney disease, chronic liver disease, neurological diseases, oncology, immunosuppression, oxygen support | | | | | | |

**Table S4. Sensitivity analysis of outcomes in hospitalized COVID-19 patients treated with nirmatrelvir-ritonavir compared to control group after multiple imputation.**

| Outcomes | Nirmatrelvir-ritonavir | Control | P value | Multivariate Cox regression† | IPTW-adjusted Cox model |
| --- | --- | --- | --- | --- | --- |
| n (%) | n (%) | HR (95%CI) | HR (95%CI) |
| All-cause mortality | 20 (12.0) | 30 (22.7) | 0.013 | 0.57 (0.31, 1.05) | 0.55 (0.37, 0.81) |
| All-cause mortality within 7 days | 8 (4.8) | 18 (13.6) | 0.007 | 0.48 (0.20, 1.16) | 0.34 (0.18, 0.64) |
| All-cause mortality within 14 days | 16 (9.6) | 24 (18.2) | 0.030 | 0.62 (0.31, 1.22) | 0.55 (0.35, 0.87) |
| *Disease progression (invasive mechanical ventilation, ICU admission、death） | 22 (14.7) | 30 (23.3) | 0.043 | 0.72 (0.40, 1.29) | 0.61 (0.42, 0.88) |
| *Invasive mechanical ventilation | 4 (2.7) | 2 (1.6) | 0.507 | 6.37 (0.86, 47.00) | 0.61 (0.27, 1.40) |
| *ICU Admission | 2 (1.3） | 1 (0.8) | 0.705 | - | 1.86 (0.45, 7.73) |
| Cardiovascular thromboembolic events | 2 (1.2) | 0 (0.0) | 0.207 | - | - |
| Readmission | 7(4.2) | 8 (6.1) | 0.462 | 0.79 (0.25, 2.52) | 0.68 (0.34, 1.37) |
| Re-infection with COVID-19 | 1 (0.6) | 0 (0.0) | 0.073 | - | - |
| HR, hazard ratio; CI, confidence interval; BMI, body mass index; ICU, intensive center unit  *25 patients admitted to the ICU or receiving invasive tracheal intubation within 24 h of admission were excluded † Adjusted covariates including age, sex, BMI, adequate health insurance, vaccination status, chronic lung diseases chronic, cardiovascular disease, cerebrovascular disease, chronic kidney disease, chronic liver disease, neurological diseases, oncology, immunosuppression, oxygen support | | | | | |

**Table S5. Sensitivity analysis of nirmatrelvir-ritonavir's effects on outcomes in hospitalized COVID-19 patients including events within 24 Hours of admission.**

| outcomes | Nirmatrelvir-ritonavir | Control | P value | Unadjusted | IPTW-adjusted Cox model |
| --- | --- | --- | --- | --- | --- |
| n (%) | n (%) |  | HR (95%CI) | HR (95%CI) |
| All-cause mortality | 23 (13.5%) | 36 (26.1%) | 0.005 | 0.47 (0.28, 0.80) | 0.58 (0.39, 0.86) |
| All-cause mortality within 7 days | 11 (6.5%) | 24 (17.4%) | 0.003 | 0.36 (0.17, 0.73) | 0.41 (0.23, 0.73) |
| All-cause mortality within 14 days | 19 (11.2%) | 30 (21.7%) | 0.012 | 0.48 (0.27, 0.85) | 0.57 (0.37, 0.89) |
| Disease progression（invasive mechanical ventilation, ICU admission、death） | 42 (24.7%) | 39 (28.3%) | 0.481 | 0.86 (0.56, 1.33) | 1.04 (0.75, 1.44) |
| invasive mechanical ventilation | 13 (7.7%) | 4 (2.9%) | 0.070 | 2.49 (0.81, 7.64) | 2.64 (1.15, 6.08) |
| ICU Admission | 19 (11.2%) | 3 (2.2%) | 0.002 | 5.10 (1.51, 17.25) | 5.10 (2.19, 11.85) |
| Cardiovascular thromboembolic events | 2 (1.2%) | 0 (0.0%) | 0.201 | - | - |
| Readmission | 7 (4.1%) | 8 (5.8%) | 0.496 | 0.57 (0.20, 1.56) | 0.84 (0.41, 1.71) |
| Re-infection with COVID-19 | 1 (0.6%) | 0 (0.0%) | 0.367 | - | - |

HR, hazard ratio; CI, confidence interval; BMI, body mass index; ICU, intensive center unit

**Table S6. Subgroup analyses of all-cause mortality for hospitalized COVID-19 nirmatrelvir-ritonavir versus control group after IPTW-adjusted.**

|  | **Nirmatrelvir-ritonavir** | | **Control** | | **IPTW-adjusted model** |
| --- | --- | --- | --- | --- | --- |
|  | **events** | **%** | **events** | **%** | **HR (95%CI)** |
| Sex |  |  |  |  |  |
| male | 16 | 15.8 | 20 | 22.2 | 0.69 (0.44, 1.08) |
| female | 4 | 6.1 | 10 | 23.8 | 0.38 (0.18, 0.82) |
| Age, years |  |  |  |  |  |
| <65 | 4 | 6.3 | 0 | 0.0 | - |
| ≥65 | 16 | 15.5 | 30 | 37.5 | 0.34 (0.21, 0.52) |
| Ethnicity |  |  |  |  |  |
| Han | 19 | 11.8 | 29 | 22.3 | 0.58 (0.39, 0.85) |
| Minority | 1 | 16.7 | 1 | 50.0 | 0.82 (0.15, 4.39) |
| BMI, kg/m2 |  |  |  |  |  |
| ≤30 | 18 | 11.6 | 26 | 22.0 | 0.52 (0.35, 0.78) |
| >30 | 1 | 12.5 | 3 | 23.1 | 2.24 (0.48, 10.40) |
| Adequate health insurance | |  |  |  |  |
| Yes | 19 | 13.3 | 28 | 25.7 | 1.05 (0.19, 5.88) |
| No | 1 | 4.2 | 2 | 8.7 | 0.55 (0.37, 0.82) |
| Vaccination status, doses | |  |  |  |  |
| ≤1 | 11 | 16.4 | 23 | 37.7 | 0.49 (0.31, 0.79) |
| 2 | 3 | 18.8 | 4 | 25.0 | 0.57 (0.19, 1.70) |
| ≥3 | 4 | 5.6 | 2 | 4.2 | 1.12 (0.47, 2.69) |
| Hypertension |  |  |  |  |  |
| Yes | 10 | 15.6 | 17 | 28.3 | 0.62 (0.37, 1.05) |
| No | 10 | 9.7 | 13 | 18.1 | 0.55 (0.31, 0.98) |
| Diabetes |  |  |  |  |  |
| Yes | 6 | 16.2 | 10 | 33.3 | 0.42 (0.20, 0.90) |
| No | 14 | 10.8 | 20 | 19.6 | 0.66 (0.42, 1.04) |
| Chronic lung diseases | |  |  |  |  |
| Yes | 9 | 22.5 | 18 | 40.9 | 0.53 (0.32, 0.88) |
| No | 11 | 8.7 | 12 | 13.6 | 0.64 (0.35, 1.17) |
| Cardiovascular disease | |  |  |  |  |
| Yes | 8 | 19.1 | 18 | 32.7 | 0.52 (0.30, 0.92) |
| No | 12 | 9.6 | 12 | 15.6 | 0.67 (0.39, 1.15) |
| Cerebrovascular disease | |  |  |  |  |
| Yes | 7 | 30.4 | 11 | 39.3 | 0.67 (0.35, 1.29) |
| No | 13 | 9.0 | 19 | 18.3 | 0.59 (0.37, 0.95) |
| Chronic kidney disease | |  |  |  |  |
| Yes | 6 | 23.1 | 8 | 34.8 | 0.62 (0.31, 1.23) |
| No | 14 | 9.9 | 22 | 20.2 | 0.57 (0.36, 0.91) |
| Chronic liver disease | |  |  |  |  |
| Yes | 5 | 31.3 | 1 | 5.6 | 6.09 (1.01, 36.55) |
| No | 15 | 9.9 | 29 | 25.4 | 0.47 (0.31, 0.72) |
| Neurological diseases | |  |  |  |  |
| Yes | 3 | 100.0 | 2 | 33.3 | 4.05 (1.03, 15.92) |
| No | 17 | 10.4 | 28 | 22.2 | 0.47 (0.31, 0.71) |
| Oncology |  |  |  |  |  |
| Yes | 1 | 5.0 | 1 | 10.0 | - |
| No | 19 | 12.9 | 29 | 23.8 | 0.60 (0.41, 0.88) |
| Immunosuppression | |  |  |  |  |
| Yes | 2 | 7.7 | 1 | 9.1 | 0.55 (0.06, 5.44) |
| No | 18 | 12.8 | 29 | 24.0 | 0.59 (0.40, 0.87) |
| Oxygen support |  |  |  |  |  |
| Yes | 19 | 15.1 | 29 | 29.0 | 0.55 (0.37, 0.82) |
| No | 1 | 2.4 | 1 | 3.1 | 0.93 (0.17, 5.04) |
| Invasive mechanical ventilation |  |  |  |  |  |
| Yes | 0 | 0.0 | 0 | 0.0 | 1.00 (1.00, 1.00) |
| No | 20 | 12.4 | 30 | 22.9 | 0.59 (0.40, 0.87) |
| ICU admission |  |  |  |  |  |
| Yes | 1 | 6.3 | 1 | 50.0 | 0.07 (0.01, 0.56) |
| No | 19 | 12.6 | 29 | 22.3 | 0.66 (0.44, 0.97) |
| Glucocorticoid use |  |  |  |  |  |
| Yes | 12 | 20.3 | 16 | 44.4 | 0.47 (0.28, 0.78) |
| No | 8 | 7.4 | 14 | 14.6 | 0.70 (0.39, 1.25) |
| Antibiotics |  |  |  |  |  |
| Yes | 10 | 16.1 | 13 | 23.6 | 0.84 (0.48, 1.49) |
| No | 10 | 9.5 | 17 | 22.1 | 0.43 (0.25, 0.73) |

**Table S7 Subgroup analyses of Disease progression within 28 days for hospitalized COVID-19 nirmatrelvir-ritonavir versus control group.**

|  | Nirmatrelvir-ritonavir | | Control | | IPTW-adjusted model |
| --- | --- | --- | --- | --- | --- |
|  | events | % | events | % | HR (95%CI) |
| Sex |  |  |  |  |  |
| male | 18 | 17.8% | 21 | 23.3% | 0.73 (0.48, 1.12) |
| female | 6 | 9.1% | 10 | 23.8% | 0.48 (0.24, 0.98) |
| Age, years |  |  |  |  |  |
| <65 | 6 | 9.4% | 0 | 0.0% | inf. (0.00, Inf) |
| ≥65 | 18 | 17.5% | 31 | 38.8% | 0.38 (0.25, 0.57) |
| Ethnicity |  |  |  |  |  |
| Han | 23 | 14.3% | 30 | 23.1% | 0.65 (0.45, 0.95) |
| Minority | 1 | 16.7% | 1 | 50.0% | 0.82 (0.15, 4.39) |
| BMI, kg/m2 |  |  |  |  |  |
| ≤30 | 22 | 14.2% | 27 | 22.9% | 0.60 (0.41, 0.88) |
| >30 | 1 | 12.5% | 3 | 23.1% | 2.24 (0.48, 10.40) |
| Adequate health insurance |  |  |  |  |  |
| Yes | 21 | 14.7% | 29 | 26.6% | 1.99 (0.43, 9.11) |
| No | 3 | 12.5% | 2 | 8.7% | 0.59 (0.41, 0.87) |
| Vaccination status, times |  |  |  |  |  |
| ≤1 | 13 | 19.4% | 23 | 37.7% | 0.59 (0.38, 0.92) |
| ≥2 | 8 | 9.1% | 7 | 10.9% | 0.87 (0.46, 1.64) |
| Hypertension |  |  |  |  |  |
| Yes | 13 | 20.3% | 18 | 30.0% | 0.75 (0.47, 1.20) |
| No | 11 | 10.7% | 13 | 18.1% | 0.55 (0.31, 0.98) |
| Diabetes |  |  |  |  |  |
| Yes | 6 | 16.2% | 10 | 33.3% | 0.43 (0.20, 0.92) |
| No | 18 | 13.9% | 21 | 20.6% | 0.76 (0.50, 1.16) |
| Chronic lung diseases |  |  |  |  |  |
| Yes | 13 | 32.5% | 18 | 40.9% | 0.67 (0.42, 1.07) |
| No | 11 | 8.7% | 13 | 14.8% | 0.59 (0.33, 1.06) |
| Cardiovascular disease |  |  |  |  |  |
| Yes | 10 | 23.8% | 19 | 34.6% | 0.57 (0.34, 0.97) |
| No | 14 | 11.2% | 12 | 15.6% | 0.78 (0.47, 1.31) |
| Cerebrovascular disease |  |  |  |  |  |
| Yes | 7 | 30.4% | 12 | 42.9% | 0.56 (0.30, 1.06) |
| No | 17 | 11.8% | 19 | 18.3% | 0.75 (0.48, 1.17) |
| Chronic kidney disease |  |  |  |  |  |
| Yes | 8 | 30.8% | 9 | 39.1% | 0.80 (0.44, 1.46) |
| No | 16 | 11.4% | 22 | 20.2% | 0.59 (0.37, 0.94) |
| Chronic liver disease |  |  |  |  |  |
| Yes | 5 | 31.3% | 2 | 11.1% | 2.16 (0.63, 7.47) |
| No | 19 | 12.6% | 29 | 25.4% | 0.58 (0.39, 0.85) |
| Neurological diseases |  |  |  |  |  |
| Yes | 3 | 100.0% | 2 | 33.3% | 4.05 (1.03, 15.92) |
| No | 21 | 12.8% | 29 | 23.0% | 0.55 (0.37, 0.81) |
| Oncology |  |  |  |  |  |
| Yes | 2 | 10.0% | 2 | 20.0% | 0.00 (0.00, Inf) |
| No | 22 | 15.0% | 29 | 23.8% | 0.70 (0.49, 1.02) |
| Immunosuppression |  |  |  |  |  |
| Yes | 3 | 11.5% | 2 | 18.2% | 0.22 (0.03, 1.75) |
| No | 21 | 15.0% | 29 | 24.0% | 0.69 (0.48, 1.00) |
| Oxygen support |  |  |  |  |  |
| Yes | 23 | 18.3% | 30 | 30.0% | 0.62 (0.43, 0.91) |
| No | 1 | 2.4% | 1 | 3.1% | 0.93 (0.17, 5.04) |
| Invasive mechanical ventilation |  |  |  |  |  |
| Yes | 0 | 0.0% | 0 | 0.0% | 1.00 (1.00, 1.00) |
| No | 24 | 14.9% | 31 | 23.7% | 0.67 (0.46, 0.96) |
| ICU admission |  |  |  |  |  |
| Yes | 2 | 12.5% | 1 | 50.0% | 0.12 (0.02, 0.57) |
| No | 22 | 14.6% | 30 | 23.1% | 0.73 (0.50, 1.06) |
| Glucocorticoid use |  |  |  |  |  |
| Yes | 13 | 22.0% | 16 | 44.4% | 0.49 (0.29, 0.81) |
| No | 11 | 10.2% | 15 | 15.6% | 0.84 (0.49, 1.43) |
| Antibiotics |  |  |  |  |  |
| Yes | 11 | 17.7% | 14 | 25.5% | 0.80 (0.46, 1.38) |
| No | 13 | 12.4% | 17 | 22.1% | 0.56 (0.34, 0.91) |

**Table S8. Subgroup analyses of outcomes for hospitalized COVID-19 according to vaccination and immunity status.**

| outcomes | Weak immunity without ≥2 doses of vaccination | | | Without weak immunity or weak immunity with ≥2 doses of vaccination | | | P for trend |
| --- | --- | --- | --- | --- | --- | --- | --- |
| Nirmatrelvir-ritonavir | Control | IPTW-adjusted model HR (95%CI) | Nirmatrelvir-ritonavir | Control | IPTW-adjusted model HR (95%CI) |
| Events (%) | Events (%) | n=103 | Events (%) | Events (%) | n=175 |
| All-cause mortality within 28 days | 9 (15.5) | 23 (43.4) | 0.33 (0.19, 0.56) | 6 (8.3) | 9 (9.3) | 1.37 (0.74, 2.55) | 0.0003 |
| Disease progression (invasive mechanical ventilation, ICU admission, death) within 28 days | 11 (19.0) | 23 (43.4) | 0.42 (0.26, 0.69) | 10 (10.3) | 7 (9.7) | 1.28 (0.71, 2.31) | 0.0032 |
| IPTW, inverse probability of treatment weighting; HR, hazard ratio; CI, confidence interval; BMI, body mass index; ICU, intensive center unit  Patients aged ≥65 years, or with a diagnosis of oncology or rheumatic disease, or post-organ transplantation were defined as weak immunity patients. | | | | | | | |
